# Supplementary material for: Impact of Climate Change on the Streamflow Modulated by Changes in Precipitation and Temperature in the North Latitude Watershed of Nepal
Source: MDPI journal article supplement (doi:10.3390/hydrology8030117), 2021-08-06
Supplement: s1 [file s1]

**Table S1.** The temporal and spatial extent of the hydro-climatic variables used in the study at the Thuli Bheri River Basin, Nepal.

| SN | Station Index | Station Name    | Lat. (Deg.) | Long. (Deg.) | Elevation (masl) | Station type  | Temporal Period | Resolution |
|----|---------------|-----------------|-------------|--------------|------------------|---------------|-----------------|------------|
| 1  | 303           | Jumla           | 29.28       | 82.17        | 2300             | Synoptic      | 1981-2014       | Daily      |
| 2  | 304           | Guthi Chaur     | 29.28       | 82.32        | 3080             | Precipitation | 1981-2014       | Daily      |
| 3  | 310           | Dipal Gaun      | 29.27       | 82.22        | 2310             | Climatology   | 1981-2014       | Daily      |
| 4  | 312           | Dunai           | 28.93       | 82.92        | 2058             | Climatology   | 1981-2014       | Daily      |
| 5  | 404           | Jajarkot        | 28.70       | 82.20        | 1231             | Precipitation | 1981-2014       | Daily      |
| 6  | 418           | Maina Gaun      | 28.98       | 82.28        | 2000             | Precipitation | 1981-2014       | Daily      |
| 7  | 501           | Rukumkot        | 28.60       | 82.63        | 1560             | Precipitation | 1981-2014       | Daily      |
| 8  | 513           | Chaur Jhari Tar | 28.63       | 82.20        | 910              | Climatology   | 1981-2014       | Daily      |
| 9  | 514           | Musikot (Rukum) | 28.63       | 82.48        | 2100             | Climatology   | 1981-2014       | Daily      |
| 10 | 616           | Gurja Khani     | 28.60       | 83.22        | 2530             | Climatology   | 1981-2014       | Daily      |
| 11 | 265           | Rimma           | 28.71       | 82.28        | 550              | Streamflow    | 1981-2014       | Daily      |

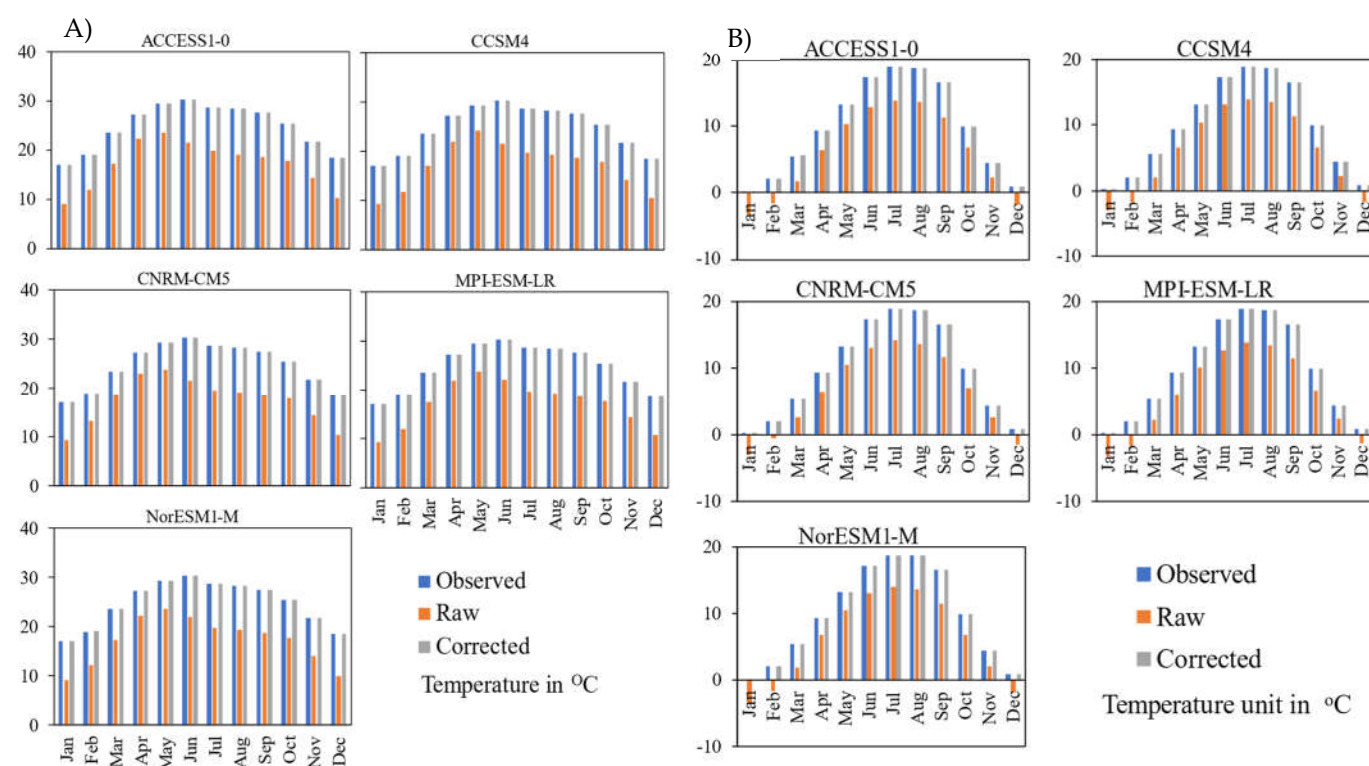

**Figure S1.** Ensemble average monthly distribution of (A) maximum and (B) minimum temperature for different climate models before and after bias correction. Each subplot represents the monthly distribution for different climate models (i.e., ACCESS1-0, CCSM4, CNRM-CM5, MPI-ESM-LR, and NorESM1-M). The 'Observed' data represents the ground station data, 'Raw' data represents the climate model data before correction is applied, and 'Corrected' represents the climate model data after applying the correction. The ensemble is obtained by taking the average from two ground stations.

**Table S2.** The statistical performance of the maximum and minimum temperature at two ground stations for all the climate models before and after applying the bias corrections. ‘Raw’ represents the data before bias correction is applied, and ‘BC’ represents the data after applying bias correction.

| Climate Model | Statistical Indicator | Maximum Temperature |       |             |       | Minimum Temperature |      |             |       |
|---------------|-----------------------|---------------------|-------|-------------|-------|---------------------|------|-------------|-------|
|               |                       | Station 303         |       | Station 513 |       | Station 303         |      | Station 513 |       |
|               |                       | Raw                 | BC    | Raw         | BC    | Raw                 | BC   | Raw         | BC    |
| ACCESS 1-0    | R <sup>2</sup>        | 0.83                | 0.79  | 0.51        | 0.87  | 0.88                | 0.95 | 0.95        | 0.96  |
|               | r                     | 0.91                | 0.89  | 0.72        | 0.93  | 0.94                | 0.98 | 0.97        | 0.98  |
|               | Mean                  | 10.03               | 20.59 | 24.22       | 28.85 | -0.64               | 4.72 | 12.70       | 14.80 |
|               | Stdev                 | 5.84                | 4.51  | 4.96        | 5.08  | 6.40                | 7.59 | 6.23        | 6.28  |
|               | RMSE                  | 10.87               | 2.07  | 5.99        | 1.83  | 5.98                | 1.67 | 2.93        | 2.03  |
|               | RSR                   | 1.86                | 0.46  | 1.21        | 0.36  | 0.93                | 0.22 | 0.47        | 0.32  |
| CNRM-CM5      | R <sup>2</sup>        | 0.84                | 0.82  | 0.46        | 0.87  | 0.89                | 0.94 | 0.95        | 0.96  |
|               | r                     | 0.91                | 0.90  | 0.68        | 0.93  | 0.95                | 0.97 | 0.97        | 0.98  |
|               | Mean                  | 10.60               | 20.59 | 24.28       | 28.85 | -0.05               | 4.72 | 12.92       | 14.80 |
|               | Stdev                 | 5.62                | 4.45  | 5.05        | 5.08  | 6.12                | 7.58 | 6.20        | 6.27  |
|               | RMSE                  | 10.27               | 1.92  | 6.12        | 1.89  | 5.45                | 1.80 | 2.81        | 2.10  |
|               | RSR                   | 1.83                | 0.43  | 1.21        | 0.37  | 0.89                | 0.24 | 0.45        | 0.34  |
| GFDL-CM3      | R <sup>2</sup>        | 0.82                | 0.79  | 0.53        | 0.85  | 0.88                | 0.95 | 0.94        | 0.96  |
|               | r                     | 0.91                | 0.89  | 0.73        | 0.92  | 0.94                | 0.98 | 0.97        | 0.98  |
|               | Mean                  | 10.05               | 20.59 | 24.00       | 28.85 | -0.60               | 4.72 | 12.75       | 14.80 |
|               | Stdev                 | 6.17                | 4.52  | 4.81        | 5.10  | 6.46                | 7.59 | 6.23        | 6.28  |
|               | RMSE                  | 10.92               | 2.11  | 6.07        | 2.02  | 5.97                | 1.67 | 2.98        | 2.10  |
|               | RSR                   | 1.77                | 0.47  | 1.26        | 0.40  | 0.92                | 0.22 | 0.48        | 0.33  |
| MPI-ESM-LR    | R <sup>2</sup>        | 0.86                | 0.82  | 0.52        | 0.85  | 0.88                | 0.95 | 0.94        | 0.96  |
|               | r                     | 0.93                | 0.90  | 0.72        | 0.92  | 0.94                | 0.98 | 0.97        | 0.98  |
|               | Mean                  | 10.09               | 20.59 | 24.26       | 28.85 | -0.65               | 4.72 | 12.71       | 14.80 |
|               | Stdev                 | 5.77                | 4.47  | 4.92        | 5.09  | 6.25                | 7.58 | 6.16        | 6.28  |
|               | RMSE                  | 10.77               | 1.93  | 5.94        | 2.01  | 6.02                | 1.67 | 2.98        | 2.08  |
|               | RSR                   | 1.87                | 0.43  | 1.21        | 0.39  | 0.96                | 0.22 | 0.48        | 0.33  |
| NorESM1-M     | R <sup>2</sup>        | 0.85                | 0.81  | 0.53        | 0.87  | 0.89                | 0.95 | 0.95        | 0.96  |
|               | r                     | 0.92                | 0.90  | 0.73        | 0.94  | 0.95                | 0.98 | 0.97        | 0.98  |
|               | Mean                  | 10.05               | 20.59 | 24.18       | 28.85 | -0.53               | 4.72 | 12.83       | 14.80 |
|               | Stdev                 | 6.00                | 4.50  | 4.94        | 5.08  | 6.60                | 7.58 | 6.23        | 6.27  |
|               | RMSE                  | 10.85               | 1.98  | 5.97        | 1.83  | 5.81                | 1.69 | 2.88        | 2.08  |
|               | RSR                   | 1.81                | 0.44  | 1.21        | 0.36  | 0.88                | 0.22 | 0.46        | 0.33  |

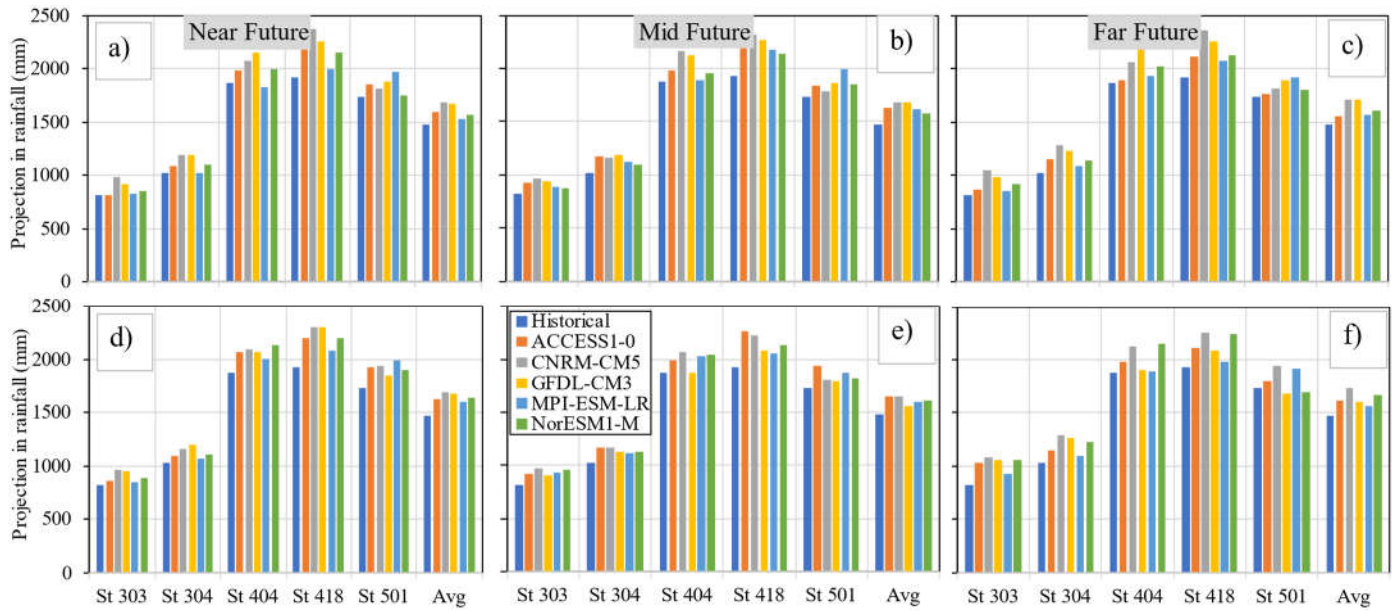

**Figure S2:** Temporal projection (mm) in precipitation pattern at various stations using multiple climate models for three future time windows, namely, Near Future (2020-2040), Mid Future (2041-2070), and Far Future (2071-2100) under RCP 4.5 (a, b & c) and RCP 8.5 (d, e & f)

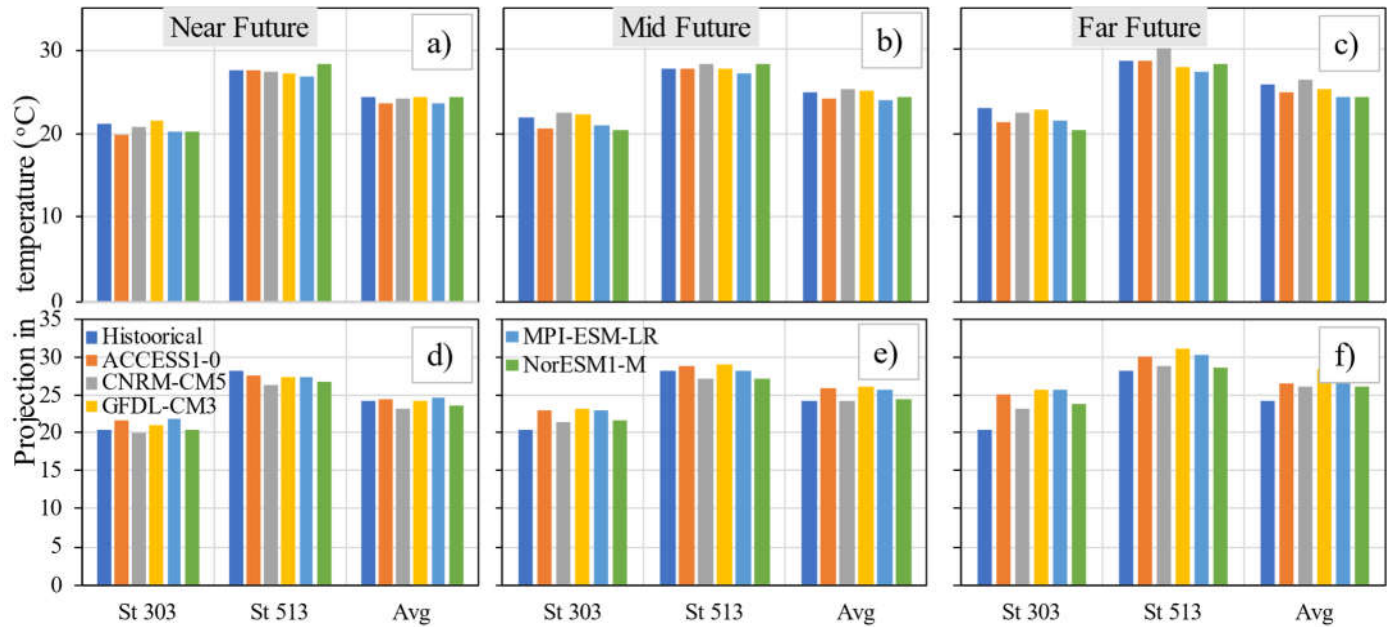

**Figure S3:** Temporal projection in maximum temperature (°C) pattern at various stations using multiple climate models for three future time windows, namely, Near Future (2020-2040), Mid Future (2041-2070), and Far Future (2071-2100) under RCP 4.5 (a, b & c) and RCP 8.5 (d, e & f)

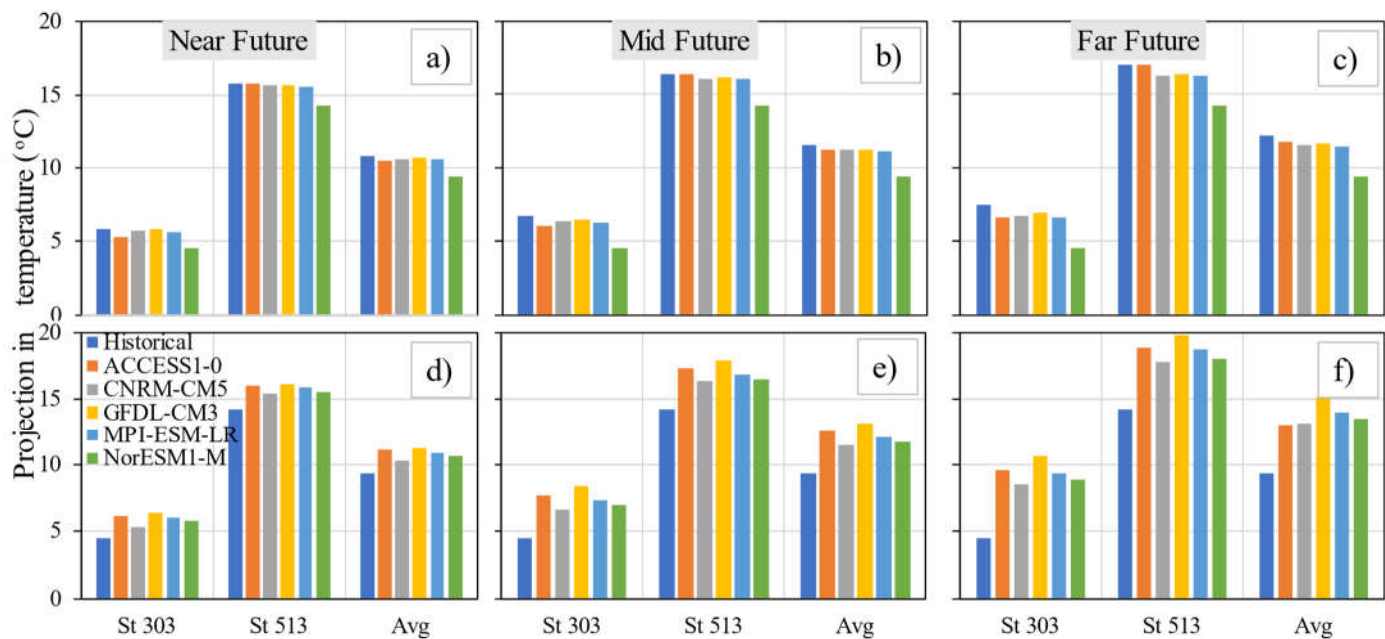

**Figure S4:** Temporal projection in minimum temperature (°C) pattern at various stations using multiple climate models for three future time windows, namely, Near Future (2020-2040), Mid Future (2041-2070), and Far Future (2071-2100) under RCP 4.5 (a, b & c) and RCP 8.5 (d, e & f)

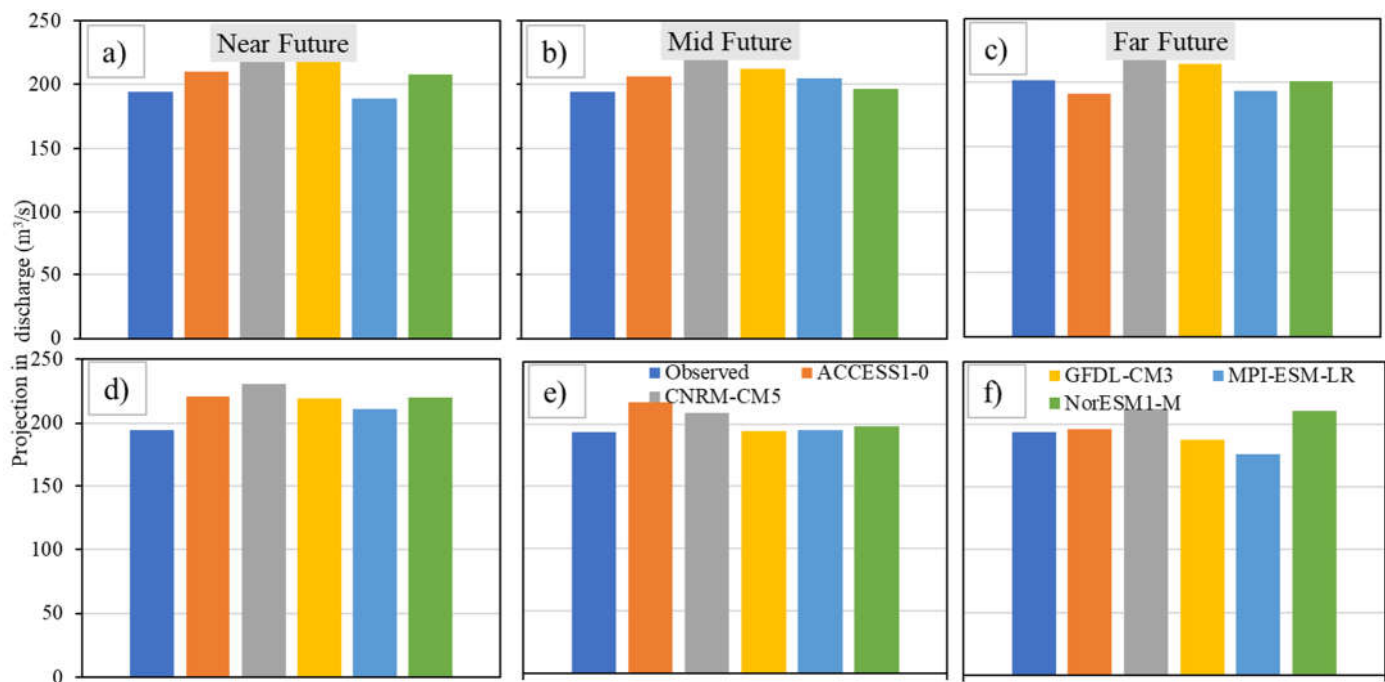

**Figure S5:** Temporal projection in streamflow (m³/s) pattern at various stations using multiple climate models for three future time windows, namely, Near Future (2020-2040), Mid Future (2041-2070), and Far Future (2071-2100) under RCP 4.5 (a, b & c) and RCP 8.5 (d, e & f)

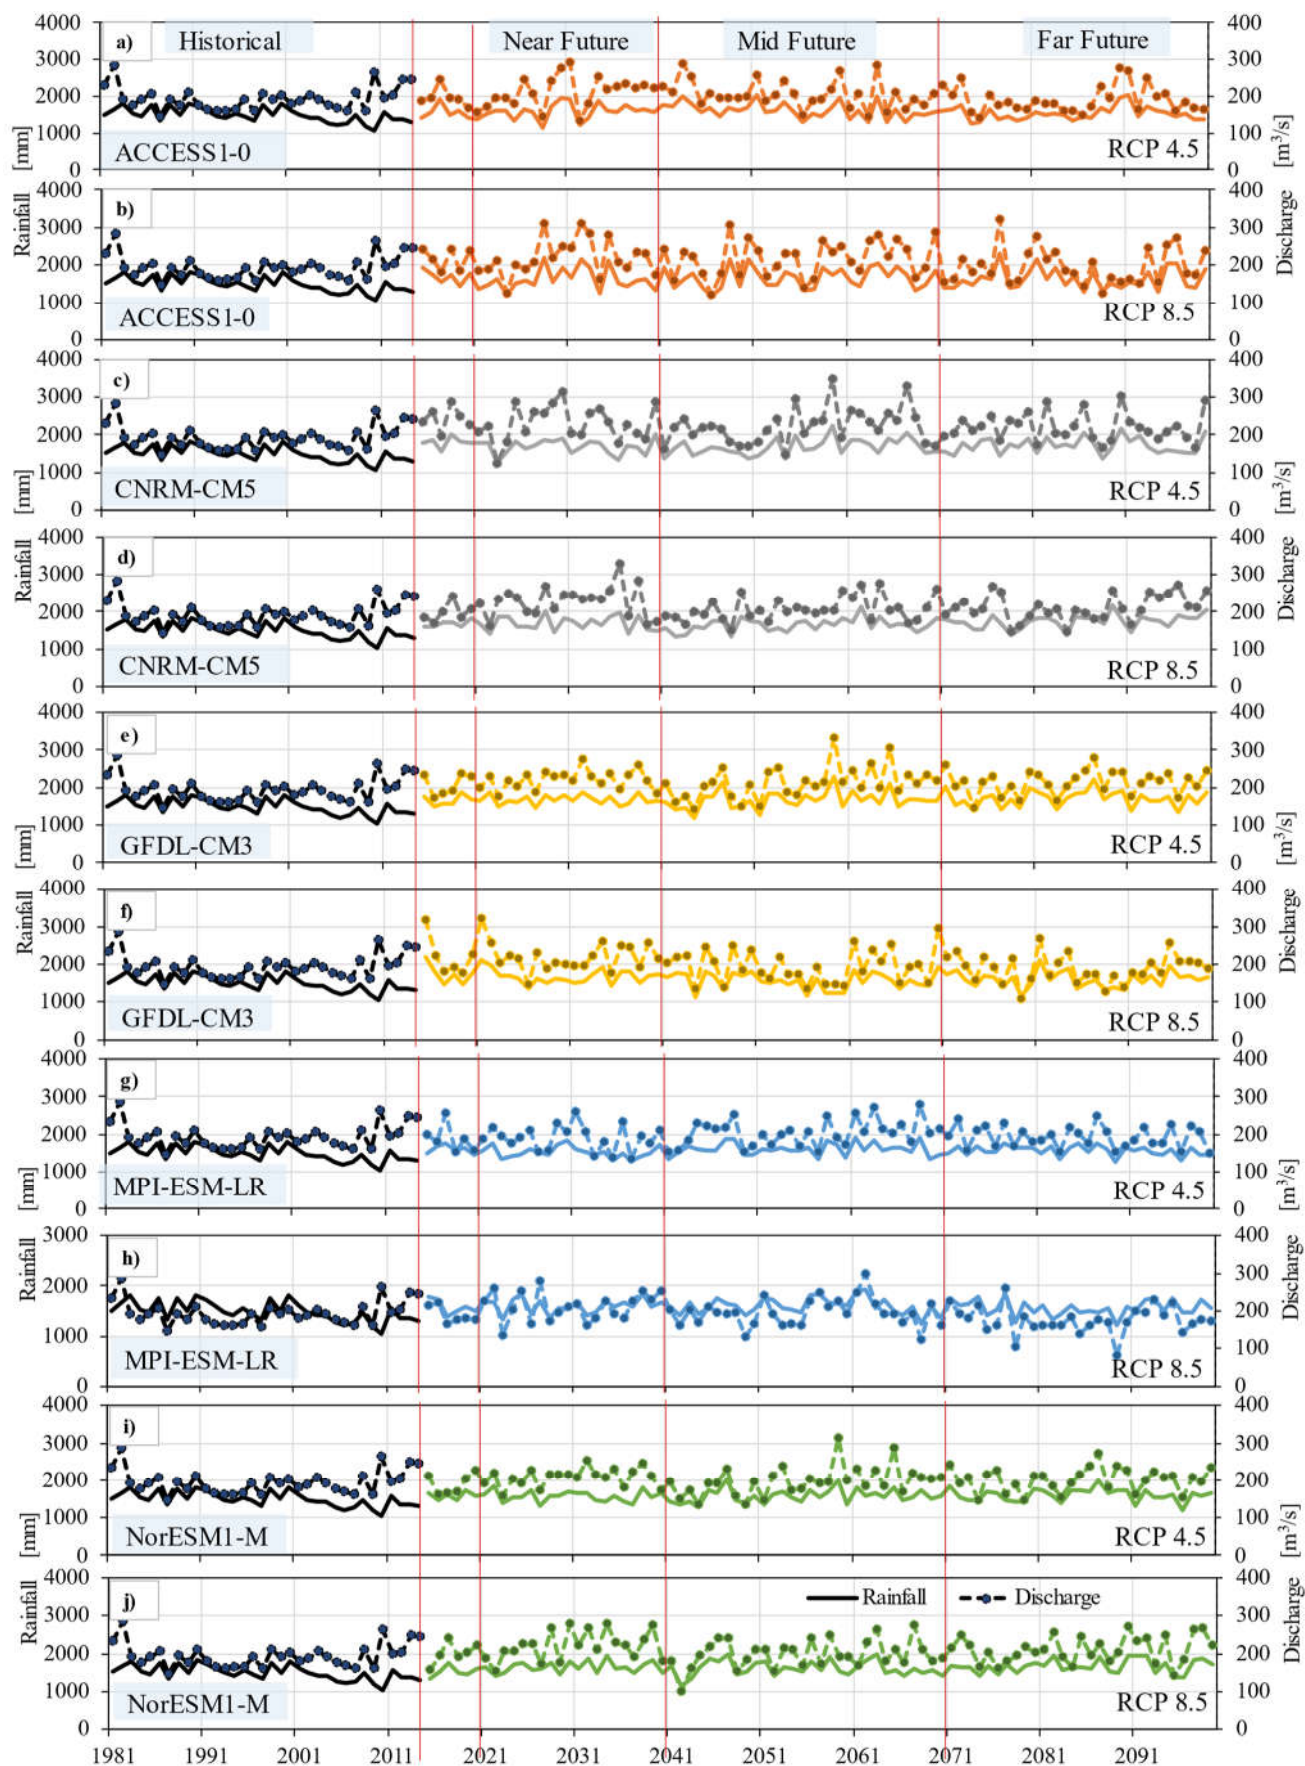

**Figure S6:** Temporal relation between precipitation (mm) and streamflow (m³/s) pattern at various stations using multiple climate models for three future time windows, namely, Near Future (2020-2040), Mid Future (2041-2070), and Far Future (2071-2100) under RCP 4.5 (a, c, e,
